# Supplementary material for: Biostimulatory activities of Ascophyllum nodosum extract in tomato and sweet pepper crops in a tropical environment
Source: PubMed Central journal article supplement (PMC6516672; doi:10.1371/journal.pone.0216710), 2019-05-14
Supplement: pone.0216710.s001.pdf [file pone.0216710.s001.pdf]

**Table 1: Oligonucleotide primers used in the study**

| Organism                                    | Gene                         | Sequence                                                 | Function                                                       | Amplicon size (bp) | Reference |
|---------------------------------------------|------------------------------|----------------------------------------------------------|----------------------------------------------------------------|--------------------|-----------|
| <i>A. solani</i>                            | <i>SP-sol-1658</i>           | F- GTAGAGTATGTTGAATACTCTA<br>ACCAG ACAA                  | Species specific primer for <i>A. solani</i>                   | 437                | [1]       |
|                                             |                              | R- ATGTTAAGAATTTGTCCTGAACA<br>GTTT                       |                                                                |                    |           |
| <i>X. campestris</i> pv. <i>vesicatoria</i> | <i>XVI</i>                   | F- CAGTCCTCCAGCACCGAAC                                   | Species specific primer for <i>X. c</i> pv. <i>vesicatoria</i> | 275                | [2]       |
|                                             |                              | R- TCTCGTCGCGGAAGTACTCA                                  |                                                                |                    |           |
| <i>Tomato-Solanum lycopersicum</i>          | <i>β-actin</i>               | F-CTCGAGCAGTGTTTCCCAGT                                   | House-keeping gene                                             | 247                | [3]       |
|                                             |                              | R-GGTGCCTCAGTCAGGAGAAC                                   |                                                                |                    |           |
|                                             | <i>PR-1a</i>                 | F- TCCTCCATTTTCGTTGCTTGT                                 | <i>PR-1</i> , SA-inducible defence gene                        | 281                |           |
|                                             |                              | R- TCGTCCCACATCTTCACAGC                                  |                                                                |                    |           |
|                                             | <i>PIN II</i>                | F-ACGACGTGTTGCACTGGTTA                                   | <i>Pin-II</i> , JA-inducible gene                              | 198                |           |
|                                             |                              | R-GCAACCCTCTCCTGCACTAC                                   |                                                                |                    |           |
|                                             | <i>ETR-1</i>                 | F-TGGTGTCATGTCCTTGCTGG                                   | Ethylene response gene                                         | 70                 |           |
|                                             |                              | R-CTGAGTAGCGTGGCTGTGAT                                   |                                                                |                    |           |
|                                             | <i>GA2ox 1-Sl</i>            | F- GCCATGCTCAGAGATTGAACGATTG                             | Gibberellin 2 oxidase-gibberellin biosynthesis                 | 530                |           |
|                                             |                              | R- CCCACAATGAGCATCTTGACAA<br>CC                          |                                                                |                    |           |
|                                             | <i>IAA-Sl</i>                | F- CTCCAGGGTGATTTCTGT                                    | Indole-3-acetic acid-amido synthetase                          | 196                |           |
|                                             |                              | R- TTCTTTGGTCCACTGTCT                                    |                                                                |                    |           |
| <i>IPT-Sl</i>                               | F- ACTCTCTATCGACTTAGCCACTCAA | Cytokinin biosynthesis-adenylate isopentenyltransferase) | 144                                                            |                    |           |
|                                             | R- ATTACCCCTAGGCAATGATGTGT   |                                                          |                                                                |                    |           |

|                                   |                         |                                                |                                                                       |      |                   |
|-----------------------------------|-------------------------|------------------------------------------------|-----------------------------------------------------------------------|------|-------------------|
| Pepper-<br><i>Capsicum annuum</i> | <i>GA2ox 1-Ca</i>       | F-<br>GCGATACATTTATGGCGCTTTCA                  | Gibberellin 2<br>oxidase-<br>gibberellin<br>biosynthesis              | 184  | [6]               |
|                                   |                         | R-<br>CATGTGAGGTCGGGATACATTC<br>G              |                                                                       |      |                   |
|                                   | <i>IAA-Ca</i>           | F-<br>ACCCGCGTGGTCGAGTACACTA<br>GTTATGC        | Indole-3-<br>acetic acid-<br>amido<br>synthetase                      | 392  | [7]               |
|                                   |                         | R-<br>CGACGTCGTTCAAGGTGTCCATTG<br>AGGC         |                                                                       |      |                   |
|                                   | <i>IPT-Ca</i>           | F-<br>CCCTCCGTACCCATTTTCCA                     | Cytokinin<br>biosynthesis-<br>adenylate<br>isopentenyl<br>transferase | 239  | Self-<br>designed |
|                                   |                         | R- ATTTTCCAGCCCCGGTCACT                        |                                                                       |      |                   |
|                                   | <i>β-actin</i>          | F-<br>AGGGATGGGTCAAAGGATGC                     | Actin,<br>House-<br>keeping gene                                      | 290  | [6]               |
|                                   |                         | R-<br>GAGACAACACCGCCTGAATAGC                   |                                                                       |      |                   |
|                                   | <i>CaPR-1a</i>          | F-<br>CTGGTGCCGTGAAGATGTGGGT                   | <i>PR-1</i> , SA-<br>inducible<br>defence gene                        | 157  | [8]               |
|                                   |                         | R-<br>TACCACCCATTGTTGCACCGAA                   |                                                                       |      |                   |
| <i>CaPin-11</i>                   | F-ATGGCTGTTCCCAAAGAAG   | <i>Pin-II</i> , JA-<br>inducible<br>gene       | 292                                                                   | [9]  |                   |
|                                   | R-CTGTTCATGCTTTTACTTTTC |                                                |                                                                       |      |                   |
| <i>CaETR-1</i>                    | F-CCTAAACGCCTCTTTGGTCT  | <i>Etr-1</i> ,<br>Ethylene<br>response<br>gene | 348                                                                   | [10] |                   |
|                                   | R-TGCTATTGGCTACTCTTCTG  |                                                |                                                                       |      |                   |

## References

1. Vandecasteele M, Landschoot S, Carrette J, Verwaeren J, Höfte M, Audenaert K, et al. Species prevalence and disease progression studies demonstrate a seasonal shift in the *Alternaria* population composition on potato. *Plant Pathol.* 2018; 67: 327–336.
2. Ramkissoon A, Ramsubhag A, Jayaraman J. Phytoelicitor activity of three Caribbean seaweed species on suppression of pathogenic infections in tomato plants. *J Appl Phycol.* 2017; 34: 123–129.
3. Rayorath P, Khan W, Palanisamy R, Mackinnon SL, Stefanova R, Hankins SD, et al. Extracts of the brown seaweed *Ascophyllum nodosum* induce gibberellic acid (GA3)-independent amylase activity in barley. *J Plant Growth Regul.* 2008; 32: 123–128.
4. Lee Y, Kim YC, Kim SY, Lee IJ, Choi D, Paek KH, et al. A novel gibberellin 2-oxidase gene *CaGA2ox1* in pepper is specifically induced by incompatible plant pathogens. *Plant Biotechnol Rep.* 2012; 25: 111-113.
5. Zhang Y, Li Z, Tu Y, Cheng W, Yang Y. Tomato (*Solanum lycopersicum*) *SlIPT4*, encoding an isopentenyltransferase, is involved in leaf senescence and lycopene biosynthesis during fruit ripening. *BMC Plant Biol.* 2018; 28: 233-240.
6. Lai Y, Xu B, He L, Lin M, Cao L, Mou S, et al. Differential gene expression in pepper (*Capsicum annuum*) exposed to UV-B. *Indian J Exp Biol.* 2011; 6: 134–145.
7. Liao D, Chen X, Chen A, Wang H, Liu J, Liu J, et al. The characterization of Six auxin-induced tomato GH3 genes uncovers a member, SlGH3.4, strongly responsive to arbuscular mycorrhizal symbiosis. *Plant Cell Physiol.* 2015; 34: 123-144.
8. Zhang YL, Li DW, Gong ZH, Wang JE, Yin YX, Ji JJ. Genetic determinants of the defense response of resistant and susceptible pepper (*Capsicum annuum*) cultivars infected with *Phytophthora capsici* (Oomycetes; *Pythiaceae*). *Genet Mol Res.* 2013; 20: 100-110.
9. Mishra M, Mahajan N, Tamhane VA, Kulkarni MJ, Baldwin IT, Gupta VS, et al. Stress inducible proteinase inhibitor diversity in *Capsicum annuum*. *BMC Plant Biol.* 2012; 12: 54–66.
10. Onate-Sanchez L, Singh KB. Identification of Arabidopsis Ethylene-Responsive Element Binding Factors with Distinct Induction Kinetics after Pathogen Infection. *Plant Physiol.* 2002; 7: 45–66.
